# Supplementary material
Source: publisher figshare collection journal article supplement (https://future-science-group.figshare.com/ndownloader/files/34921737)
Supplement: Supplementary file 1 [file 34921737]

**Supplementary Table 4.** **Total of 28 CpG markers used to differentiate esophageal and gastric adenocarcinoma (ESST) and pancreatic adenocarcinoma (PAAD).**

| **ILMN CpG ID** |
| --- |
| cg01086672 |
| cg01237565 |
| cg02201215 |
| cg02706110 |
| cg03584891 |
| cg03768513 |
| cg04812509 |
| cg05339066 |
| cg05611779 |
| cg05892484 |
| cg06118999 |
| cg06981182 |
| cg07405121 |
| cg09556952 |
| cg09719850 |
| cg10131095 |
| cg11861709 |
| cg13075322 |
| cg13116789 |
| cg15474367 |
| cg16941656 |
| cg19235339 |
| cg19641839 |
| cg20106654 |
| cg22219254 |
| cg22939733 |
| cg23034818 |
| cg25667712 |
